# Supplementary material for: Patient-tailored adoptive immunotherapy with EBV-specific T cells from related and unrelated donors
Source: PubMed Central journal article supplement (PMC10266790; doi:10.1172/jci163548), 2023-06-15
Supplement: jci-133-163548-s073.pdf [file jci-133-163548-s073.pdf]

## Supplemental Material

### Patient-tailored adoptive immunotherapy with EBV-specific T cells from related and unrelated donors A Bonifacius, et al.

#### Supplemental conflict-of-interest statement:

The following authors have declared a potential conflict of interest: GC, honoraria (Novartis, Servier), travel support (Jazz Pharmaceuticals), data safety monitoring advisory board (Jazz Pharmaceuticals); JH, honoraria (AbbVie, Amgen, Bristol-Myers Squibb, Celgene, Deutscher Ärzte-Verlag, Georg Thieme Verlag, Gilead Sciences, Janssen-Cilag, Jazz Pharmaceuticals, MedKom Akademie, MSD Sharp & Dohme, Neovii, NewConceptOncology, NIO Niedersachsen, Novartis, Mundipharma, Pfizer); HGH, leadership or fiduciary role (State and Communal Blood Transfusion Services Working Party); EJ, honoraria (JAZZ: AML), travel support (Neovii, Gilead Sciences); NK, leadership or fiduciary role (EBMT president); BMK, leadership or fiduciary role (German Pediatric PTLD study group); HCR, grants or contracts (AstraZeneca, Gilead Sciences), consulting (Vertex, Roche), honoraria (AbbVie, AstraZeneca, Vertex, Merck), travel support (AbbVie), patents (nos. 20090010927, 20214527.2-1112), cofounder (CDL Therapeutics); RUT, grants or contracts (Atara Biotherapeutics, Roche), consulting (Atara Biotherapeutics), honoraria (Atara Biotherapeutics, Roche), expert testimony (Atara Biotherapeutics), travel support (Atara Biotherapeutics, Janssen-Cilag, Roche, BeiGene, AbbVie), leadership or fiduciary role (German PTLD study group, German Society of Hematology and Oncology); DW, grants or contracts (Novartis), consulting (Sanofi, Incyte), honoraria (Mallinckrodt, Takeda), travel support (Gilead Sciences), data safety monitoring advisory board (Novartis, Behring).

# Patient-tailored adoptive immunotherapy with EBV-specific T cells from related and unrelated donors

Supplemental Figure 1

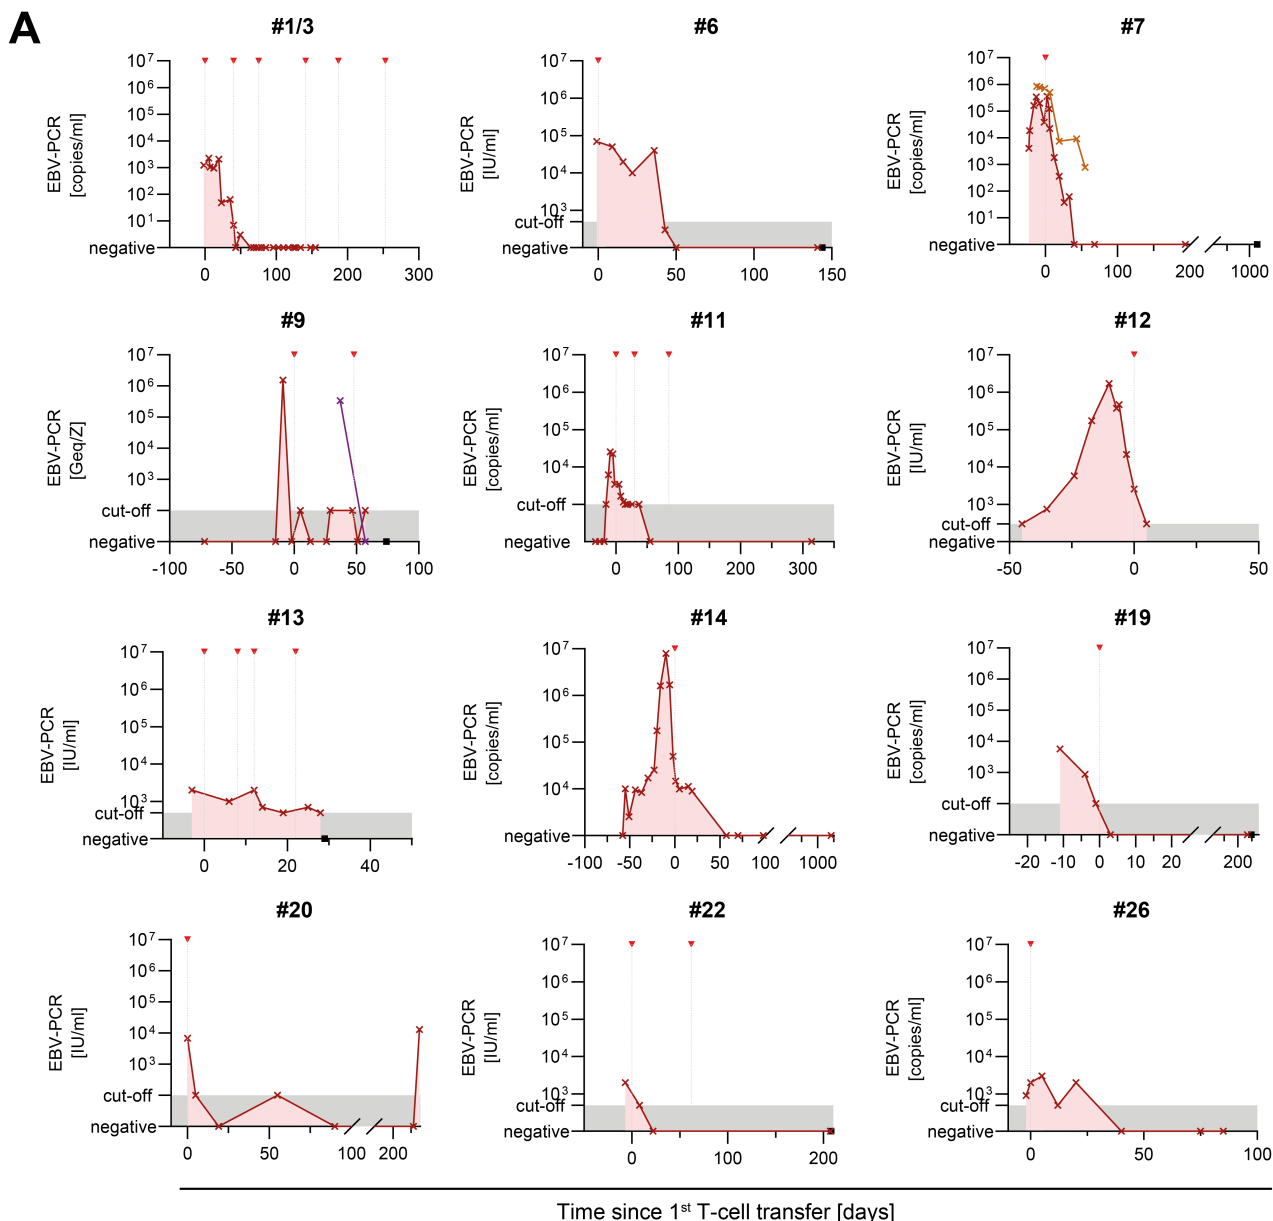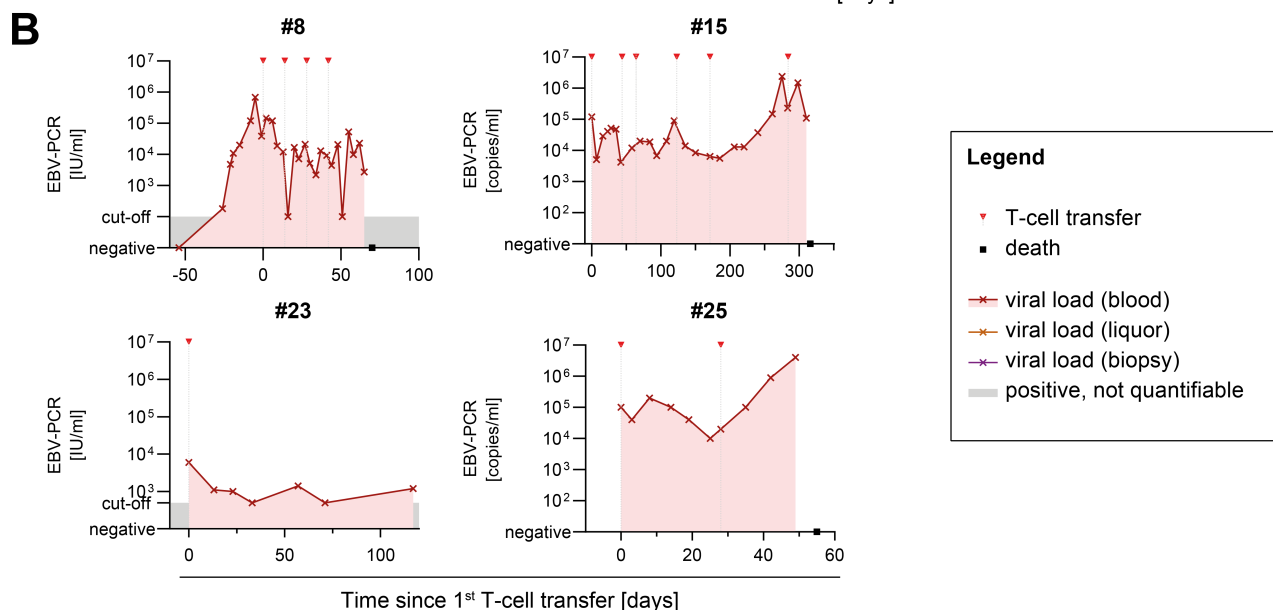

Supplemental Figure 1: Viral load in patients receiving EBV-CTLs.

(A) Patients with reduction in viral load (“responders”). (B) Patients with persisting viral load (“non-responders”).

Patient-tailored adoptive immunotherapy with EBV-specific T cells from related and unrelated donors

Supplemental Table 1A

|                                     | No. | age at 1 <sup>st</sup> transfer | Gender | SC donor / organ | underlying disease                                                  | reason for EBV-CTL transfer                                                             | histologic features of PTLD                                                    | previous therapy of EBV/PTLD                                | change in immunosuppression                 | anti-EBV/PTLD therapy in parallel to or after EBV-CTL transfer | EBV-CTL donor | Search - donor identification (days) | Donor identification - Manufacturing (days) | CD3+ cell count of 1 <sup>st</sup> transfer (per kg BW) | total CD3+ cell counts of all transfers (per kg BW) | purity (% CD3+ IFN-γ+ T cells) | number of transfers |
|-------------------------------------|-----|---------------------------------|--------|------------------|---------------------------------------------------------------------|-----------------------------------------------------------------------------------------|--------------------------------------------------------------------------------|-------------------------------------------------------------|---------------------------------------------|----------------------------------------------------------------|---------------|--------------------------------------|---------------------------------------------|---------------------------------------------------------|-----------------------------------------------------|--------------------------------|---------------------|
| HSCT patient; EBV-CTL from SCD (Ia) | 16  | 22                              | m      | MUD              | relapsed AML                                                        | PTLD                                                                                    | Hodgkin-like                                                                   | rit                                                         | no                                          | none                                                           | SCD           | -                                    | 40                                          | 2.50E+04                                                | 2.50E+04                                            | 25.0                           | 1                   |
|                                     | 17  | 54                              | m      | MSD              | multiple myeloma                                                    | PTLD                                                                                    | no biopsy                                                                      | n.a.                                                        | n.a.                                        | n.a.                                                           | SCD           | -                                    | -                                           | 3.04E+04                                                | 3.04E+04                                            | 17.7                           | 1                   |
|                                     | 18  | 73                              | m      | MUD              | MDS                                                                 | PTLD                                                                                    | DLBCL                                                                          | rit, ster, ofatumumab                                       | no                                          | none                                                           | SCD           | -                                    | 2                                           | 2.22E+05                                                | 2.22E+05                                            | 38.8                           | 1                   |
|                                     | 19  | 66                              | f      | MUD              | AML                                                                 | PTLD                                                                                    | classical Hodgkin's disease                                                    | rit, CHOP                                                   | stop of MMF and calcineurin inhibitor       | none                                                           | SCD           | -                                    | 2                                           | 1.21E+05                                                | 1.21E+05                                            | 42.1                           | 1                   |
|                                     | 20  | 65                              | m      | MUD              | multiple myeloma                                                    | PTLD                                                                                    | no biopsy                                                                      | rit                                                         | everolimus instead of calcineurin inhibitor | none                                                           | SCD           | -                                    | 5                                           | 2.50E+04                                                | 2.50E+04                                            | 43.3                           | 1                   |
|                                     | 21  | 22                              | m      | haplo            | AML                                                                 | PTLD                                                                                    | polymorphic PTLD                                                               | rit                                                         | n.a.                                        | rit                                                            | SCD           | -                                    | 14                                          | 2.50E+04                                                | 5.00E+04                                            | 29.4                           | 2                   |
|                                     | 22  | 59                              | f      | MUD              | MDS                                                                 | PTLD                                                                                    | CD30 and EBV positive PTLD                                                     | rit                                                         | no                                          | none                                                           | SCD           | -                                    | 7                                           | 5.00E+04                                                | 7.07E+04                                            | 42.1                           | 2                   |
|                                     | 23  | 55                              | m      | MUD              | NKT-NHL (EBV positive)                                              | progression of EBV-positive NKT-NHL                                                     | -                                                                              | -                                                           | stop of immunosuppression                   | pembrolizumab                                                  | SCD           | -                                    | -                                           | 5.00E+04                                                | 5.00E+04                                            | 40.5                           | 1                   |
|                                     | 24  | 28                              | f      | MUD              | EBV-associated lymphoproliferation                                  | EBV-associated lymphoproliferation, severe/uncontrolled EBV-infection, EBV encephalitis | -                                                                              | ganciclovir, aciclovir, bort, rit                           | taper and stop of everolimus                | rit                                                            | SCD           | -                                    | -                                           | 1.00E+04                                                | 1.40E+05                                            | 25.8                           | 5 (14)              |
|                                     | 25  | 44                              | m      | haplo            | aplastic anemia + PNH                                               | PTLD                                                                                    | non-destructive PTLD, plasmacytic hyperplasia                                  | rit, 1x EBV-CTL                                             | no                                          | none                                                           | SCD           | -                                    | 4                                           | 2.50E+04                                                | 2.50E+04                                            | 34.1                           | 1                   |
| 26                                  | 62  | m                               | MUD    | MDS-MPN overlap  | PTLD                                                                | DLBCL                                                                                   | rit                                                                            | yes, details n.a.                                           | mtx + rit (OPTIMAL protocol)                | SCD                                                            | -             | -                                    | 2.50E+04                                    | 5.00E+04                                                | 33.4                                                | 2                              |                     |
| HSCT patient; EBV-CTL from TPD (Ib) | 1   | 52                              | m      | MUD              | AML/MDS                                                             | PTLD                                                                                    | DLBCL                                                                          | rit, R-CHOP, bren                                           | no                                          | bren, IVIG                                                     | unrel TPD     | 0                                    | 108                                         | 1.00E+04                                                | 4.24E+04                                            | 47.2                           | 3 (6)               |
|                                     | 2   | 58                              | m      | MUD              | multiple myeloma                                                    | EBV re-activation with necrotizing encephalitis                                         | -                                                                              | rit                                                         | taper and withdrawal of CsA                 | none                                                           | unrel TPD     | 0                                    | 6                                           | 1.00E+04                                                | 1.09E+04                                            | 29.0                           | 2                   |
|                                     | 3   | 52                              | m      | MUD              | AML/MDS                                                             | PTLD                                                                                    | DLBCL                                                                          | rit, R-CHOP, bren                                           | no                                          | bren, IVIG                                                     | unrel TPD     | see #1                               | see #1                                      | 1.00E+04                                                | 4.24E+04                                            | 46.1                           | 3 (6)               |
|                                     | 4   | 68                              | m      | MUD              | myelofibrosis                                                       | EBV re-activation                                                                       | -                                                                              | rit                                                         | no                                          | none                                                           | unrel TPD     | 0                                    | 12                                          | 2.50E+04                                                | 2.50E+04                                            | 38.6                           | 1                   |
|                                     | 5   | 28                              | f      | MUD              | AML                                                                 | PTLD                                                                                    | no biopsy                                                                      | rit, ster                                                   | no                                          | none                                                           | unrel TPD     | 0                                    | 1                                           | 2.50E+04                                                | 2.50E+04                                            | 72.8                           | 1                   |
|                                     | 6   | 50                              | f      | MUD              | AML                                                                 | EBV re-activation                                                                       | -                                                                              | rit                                                         | taper and withdrawal of CsA and MMF         | none                                                           | unrel TPD     | 3                                    | 10                                          | 2.51E+04                                                | 2.50E+04                                            | 72.2                           | 1                   |
|                                     | 7   | 12                              | m      | MUD              | CMMRD, relapsed T-NHL                                               | PTLD                                                                                    | DLBCL                                                                          | rit i.v. + i.th., ganciclovir, cpm                          | taper of ster                               | ganciclovir                                                    | unrel TPD     | 6                                    | 4                                           | 5.06E+03                                                | 5.00E+03                                            | 43.9                           | 1                   |
|                                     | 8   | 14                              | f      | MUD              | secondary MDS after Ewing sarcoma                                   | PTLD                                                                                    | DLBCL                                                                          | rit                                                         | taper of CsA                                | bren                                                           | unrel TPD     | 10 (search - manufacturing)          | -                                           | 1.00E+04                                                | 4.00E+04                                            | 30.0                           | 4                   |
|                                     | 9   | 65                              | m      | MSD              | multiple myeloma                                                    | PTLD                                                                                    | monomorphic PTLD                                                               | rit, R-CHOP + bort                                          | no                                          | rit, R-CHOP                                                    | unrel TPD     | 2                                    | 4                                           | 2.50E+04                                                | 5.00E+04                                            | 76.8                           | 2                   |
|                                     | 10  | 38                              | m      | MUD              | relapsed AML                                                        | PTLD                                                                                    | B-NHL with plasmacytic differentiation                                         | rit                                                         | no                                          | rit                                                            | unrel TPD     | 15                                   | 1                                           | 2.50E+04                                                | 2.50E+04                                            | 41.8                           | 1                   |
|                                     | 11  | 5                               | f      | MSD              | familial HLH                                                        | PTLD                                                                                    | DLBCL                                                                          | rit, foscavir                                               | stop of tac                                 | rit, foscavir, bren                                            | unrel TPD     | 2                                    | 4                                           | 2.50E+04                                                | 7.50E+04                                            | 46.0                           | 3                   |
|                                     | 12  | 14                              | f      | MUD              | relapsed ALCL                                                       | EBV re-activation                                                                       | -                                                                              | rit                                                         | taper and withdrawal of CsA                 | none                                                           | unrel TPD     | 4                                    | 1                                           | 1.00E+04                                                | 1.00E+04                                            | 39.3                           | 1                   |
|                                     | 13  | 40                              | m      | MUD              | ALL                                                                 | PTLD                                                                                    | highly aggressive B-cell lymphoma                                              | rit                                                         | no                                          | none                                                           | unrel TPD     | 2                                    | 6                                           | 1.00E+04                                                | 4.00E+04                                            | 31.3                           | 4                   |
|                                     | 14  | 17                              | m      | MUD              | VSAA                                                                | PTLD                                                                                    | polymorphic PTLD                                                               | rit                                                         | sirolimus instead of tac                    | rit                                                            | rel TPD       | -                                    | 4                                           | 2.50E+04                                                | 2.50E+04                                            | 20.8                           | 1                   |
|                                     | 15  | 36                              | m      | MSD              | AML                                                                 | PTLD                                                                                    | polymorphic PTLD                                                               | rit, vcr                                                    | stop of CsA                                 | bort, bren, nivolumab                                          | rel TPD       | -                                    | 5                                           | 3.69E+04                                                | 1.60E+05                                            | 58.9                           | 6                   |
| SOT patient; EBV-CTL from TPD (II)  | 27  | 12                              | m      | kidney           | nephronophthisis                                                    | PTLD                                                                                    | no biopsy                                                                      | rit, mCOMP                                                  | no                                          | rit, bren                                                      | rel TPD       | -                                    | 39                                          | 4.17E+04                                                | 4.17E+04                                            | 22.5                           | 1                   |
|                                     | 28  | 10                              | m      | liver            | Alagille syndrome                                                   | PTLD                                                                                    | monomorphic PTLD with features of DLBCL                                        | rit, intrathecal therapy (rit, cytarabine, mtx, prednisone) | stop of tac and MMF                         | none                                                           | unrel TPD     | 3                                    | 67                                          | 2.50E+04                                                | 1.25E+05                                            | 49.9                           | 5                   |
|                                     | 29  | 14                              | f      | heart            | dilatative cardiomyopathy                                           | PTLD                                                                                    | DLBCL                                                                          | rit, mCOMP                                                  | everolimus instead of MMF, taper of CsA     | none                                                           | rel TPD       | -                                    | 53                                          | 1.00E+04                                                | 3.00E+04                                            | 41.8                           | 3                   |
|                                     | 30  | 52                              | m      | liver            | alcoholic cirrhosis                                                 | PTLD                                                                                    | plasmablastic lymphoma / monomorphic PTLD                                      | VIP prephase, CHOP                                          | stop of ster, taper of tac                  | none                                                           | rel TPD       | -                                    | 3                                           | 2.50E+04                                                | 5.00E+04                                            | 20.3                           | 2                   |
|                                     | 31  | 63                              | f      | kidney           | glomerulonephritis                                                  | PTLD                                                                                    | small cell B-NHL with partially blastic, partially plasmacytic differentiation | rit, bort, IVIG, R-CHOP-21                                  | taper of CsA                                | none                                                           | unrel TPD     | 6                                    | 20                                          | 2.51E+04                                                | 1.25E+05                                            | 43.1                           | 4                   |
| no Tx; EBV-CTL from TPD (III)       | 32  | 47                              | m      | -                | EBV-associated Hodgkin lymphoma, EBV-associated lymphoproliferation | EBV-associated lymphoproliferation                                                      | -                                                                              | R-ABVD, R-BEACOPPesk, R-AVD, rit, bren                      | -                                           | none                                                           | rel TPD       | -                                    | 25                                          | 1.00E+04                                                | 3.00E+04                                            | 51.8                           | 3                   |
|                                     | 33  | 6                               | m      | prior to SCT     | immunodeficiency (X-MEN syndrome)                                   | chronic EBV infection, EBV-induced hepatitis                                            | -                                                                              | rit                                                         | -                                           | none                                                           | rel TPD       | -                                    | 5                                           | 1.00E+04                                                | 3.50E+04                                            | 58.8                           | 2                   |
|                                     | 34  | 32                              | m      | prior to SCT     | EBV-associated Hodgkin lymphoma, suspected immunodeficiency         | high EBV viral load                                                                     | -                                                                              | rit, tocilizumab                                            | -                                           | rit, R-CHOP, bren, nivolumab                                   | rel TPD       | -                                    | 11                                          | 1.50E+04                                                | 4.34E+04                                            | 42.8                           | 3                   |
|                                     | 35  | 23                              | m      | -                | EBV-associated Hodgkin lymphoma                                     | EBV-associated refractory Hodgkin lymphoma                                              | -                                                                              | ABVD, R-ICE, brend-DHAP, irradiation, nivolumab, rit        | -                                           | bren, nivolumab                                                | unrel TPD     | 58                                   | 1                                           | 2.49E+04                                                | 5.00E+04                                            | 58.4                           | 2                   |
|                                     | 36  | 28                              | f      | prior to SCT     | EBV-associated lymphoproliferation                                  | EBV-associated lymphoproliferation, severe/uncontrolled EBV-infection, EBV encephalitis | -                                                                              | ganciclovir, aciclovir, bort, rit                           | -                                           | none                                                           | unrel TPD     | 2                                    | 1                                           | 1.00E+04                                                | 1.40E+05                                            | 43.5                           | 9 (14)              |
| EBV-CTL not used                    | 37  | 52                              | m      | auto             | EBV-associated Hodgkin lymphoma                                     | EBV-associated lymphoproliferation                                                      | -                                                                              | rit, cpm, ster                                              | -                                           | -                                                              | unrel TPD     | 0                                    | 5                                           | n.a.                                                    | -                                                   | n.a.                           | 0                   |
|                                     | 38  | 16                              | m      | MUD              | secondary AML after Ewing sarcoma                                   | PTLD                                                                                    | no biopsy                                                                      | rit                                                         | n.a.                                        | -                                                              | rel TPD       | -                                    | 5                                           | 2.51E+04                                                | -                                                   | 39.4                           | 0                   |
|                                     | 39  | 2                               | f      | haplo            | immunodeficiency (CD27 deficiency)                                  | preemptive therapy, finally not necessary                                               | -                                                                              | none                                                        | -                                           | -                                                              | SCD           | -                                    | 159                                         | 2.50E+04                                                | -                                                   | 39.1                           | 0                   |
|                                     | 40  | 6                               | m      | MUD              | immunodeficiency (X-MEN syndrome)                                   | chronic EBV infection, EBV-induced hepatitis                                            | -                                                                              | rit, allogeneic SCT                                         | -                                           | -                                                              | SCD           | -                                    | 26                                          | 9.55E+03                                                | -                                                   | 51.5                           | 0                   |

patients with two EBV-CTL manufacturing processes: No. 1 = No. 3; No. 24 = No. 36; No. 33 = No. 40

abbreviations: BW = body weight; rit = rituximab; bren = brentuximab-vedotin; ster = steroids; bort = bortezomib; cpm = cyclophosphamide; vcr = vincristin; mtx = methotrexate; CsA = cyclosporin A; tac = tacrolimus; MMF = mycophenolatemofetil

Patient-tailored adoptive immunotherapy with EBV-specific T cells from related and unrelated donors

Supplemental Table 1B

|                                     | No.  | GvHD before EBV-CTL transfer | details of GvHD before EBV-CTL transfer         | GvHD after EBV-CTL transfer | details of GvHD after EBV-CTL transfer       | reason for GvHD after EBV-CTL transfer  | transfer of unspecific DLI | clinical response             | EBV-PCR (blood) after EBV-CTL transfer | follow-up (months) | patient alive/deceased | reason for death                                                          |
|-------------------------------------|------|------------------------------|-------------------------------------------------|-----------------------------|----------------------------------------------|-----------------------------------------|----------------------------|-------------------------------|----------------------------------------|--------------------|------------------------|---------------------------------------------------------------------------|
| HSCT patient: EBV-CTL from SCD (Ia) | 16   | yes                          | cerebral vasculitis (imaging)                   | none                        | -                                            | -                                       | no                         | CR                            | negative**                             | 77                 | alive                  | -                                                                         |
|                                     | 17   | none                         | -                                               | yes                         | skin 1°, bowel 2°                            | n.a.                                    | n.a.                       | CR                            | positive but not quantifiable          | 31                 | alive                  | -                                                                         |
|                                     | 18   | yes                          | acute bowel 4°, chronic arthralgias 1°          | none                        | -                                            | -                                       | no                         | early death (n.a.)            |                                        |                    | deceased               | multiorgan failure, EBV encephalitis, septic shock, GvHD                  |
|                                     | 19   | yes                          | skin 2°, bowel 1°                               | none                        | -                                            | -                                       | no                         | CR                            | negative                               | 11                 | deceased               | adenovirus-mengoencephalitis + bacterial sepsis                           |
|                                     | 20   | none                         | -                                               | yes                         | skin moderate, bowel mild                    | reduction of everolimus                 | no                         | CR                            | negative                               | 51                 | alive                  | -                                                                         |
|                                     | 21   | none                         | -                                               | none                        | -                                            | -                                       | no                         | CR                            | negative**                             | 52                 | alive                  | -                                                                         |
|                                     | 22   | yes                          | bowel 1°                                        | chronic                     | bowel chronic (limited disease, NIH-SS mild) | unknown (association with EBV possible) | no                         | CR                            | negative                               | 6                  | deceased               | adenovirus encephalitis, pneumonia, liver failure                         |
|                                     | 23   | none                         | -                                               | yes                         | skin 3°, oral mucosa 3°, liver 3°            | association with DLI and pembrolizumab  | yes                        | CR                            | positive (stable)                      | 6                  | deceased               | influenza, sepsis                                                         |
|                                     | 24   | none                         | -                                               | none                        | -                                            | -                                       | no                         | CR                            | positive but not quantifiable          | 44                 | alive                  | -                                                                         |
|                                     | 25   | none                         | -                                               | none                        | -                                            | -                                       | no                         | PD                            | positive (stable)                      | 1                  | deceased               | progression of PTLD                                                       |
| 26                                  | none | -                            | none                                            | -                           | -                                            | yes                                     | CR                         | negative                      | 40                                     | alive              | -                      |                                                                           |
| HSCT patient: EBV-CTL from TPD (Ib) | 1    | yes                          | skin 3°; resolved before EBV-CTL transfer       | none                        | -                                            | -                                       | no                         | CR                            | negative                               | 71                 | alive                  | -                                                                         |
|                                     | 2    | none                         | -                                               | (none)                      | -                                            | -                                       | no                         | early death (n.a.)            |                                        |                    | deceased               | progression of EBV-associated necrotizing encephalitis                    |
|                                     | 3    | yes                          | skin 3°; resolved before EBV-CTL transfer       | none                        | -                                            | -                                       | no                         | CR                            | negative                               | 71                 | alive                  | -                                                                         |
|                                     | 4    | yes                          | skin 2°, liver 1°, bowel 2°, oral mucosa 2°     | yes, chronic                | skin 2°, liver 1°, bowel 2°, eyes 1°         | unknown (association with EBV possible) | no***                      | n.a.                          | negative**                             | 3                  | deceased               | chronic GvHD                                                              |
|                                     | 5    | yes                          | skin 2°                                         | (none)                      | -                                            | -                                       | no                         | early death (n.a.)            |                                        |                    | deceased               | multiorgan failure (presumably EBV-associated)                            |
|                                     | 6    | yes                          | bowel 1°                                        | yes, new symptoms           | skin 3°                                      | association with DLI (and sorafenib)    | yes                        | CR                            | negative                               | 5                  | deceased               | progression of AML                                                        |
|                                     | 7    | yes                          | skin 2°, bowel 3°                               | no new symptoms             | no new symptoms                              | -                                       | no                         | CR                            | negative (liquor: low positive)        | 38                 | deceased               | secondary malignoma (glioblastoma multiforme)                             |
|                                     | 8    | none                         | -                                               | none                        | -                                            | -                                       | no                         | PD                            | positive (decline)                     | 2                  | deceased               | progression of PTLD                                                       |
|                                     | 9    | yes                          | skin 2°                                         | none                        | -                                            | -                                       | no                         | PD                            | negative                               | 2                  | deceased               | multiorgan failure                                                        |
|                                     | 10   | yes                          | skin 3°, bowel 3°                               | (none)                      | -                                            | -                                       | no                         | early death (n.a.)            |                                        |                    | deceased               | progression of PTLD and AML                                               |
|                                     | 11   | none                         | -                                               | none                        | -                                            | -                                       | no                         | CR                            | negative                               | 11                 | alive                  | -                                                                         |
|                                     | 12   | yes                          | skin 1°                                         | none                        | -                                            | -                                       | no                         | CR                            | negative                               | 42                 | alive                  | -                                                                         |
|                                     | 13   | yes                          | skin chronic (limited disease, NIH-SS moderate) | none                        | -                                            | -                                       | no                         | SD                            | positive (decline)                     | 1                  | deceased               | atypic pneumonia                                                          |
|                                     | 14   | yes                          | skin 3°                                         | no new symptoms             | -                                            | -                                       | no                         | CR                            | negative                               | 48                 | alive                  | -                                                                         |
|                                     | 15   | yes                          | skin 2°, bowel 1°                               | yes, new symptoms           | skin 4°, bowel 2°, liver 3°                  | association with nivolumab              | no                         | PR, finally PD                | positive (increase)                    | 10                 | deceased               | progression of PTLD, severe GvHD following nivolumab, septic shock        |
| SOT patient: EBV-CTL from TPD (II)  | 27   | none                         | -                                               | none                        | -                                            | -                                       | -                          | SD****                        | negative                               | 69                 | alive                  | -                                                                         |
|                                     | 28   | none                         | -                                               | none                        | -                                            | -                                       | -                          | CR before transfer of EBV-CTL | negative**                             | 77                 | alive                  | -                                                                         |
|                                     | 29   | none                         | -                                               | none                        | -                                            | -                                       | -                          | CR before transfer of EBV-CTL | negative**                             | 61                 | alive                  | -                                                                         |
|                                     | 30   | none                         | -                                               | none                        | -                                            | -                                       | -                          | CR                            | negative**                             | 58                 | alive                  | -                                                                         |
|                                     | 31   | none                         | -                                               | none                        | -                                            | -                                       | -                          | CR                            | positive (decline)                     | 27                 | alive                  | -                                                                         |
| no Tx; EBV-CTL from TPD (III)       | 32   | -                            | -                                               | none                        | -                                            | -                                       | -                          | PD                            | positive (decline)                     | 3                  | deceased               | progression of EBV-associated lymphoproliferation                         |
|                                     | 33   | -                            | -                                               | none                        | -                                            | -                                       | -                          | SD                            | negative after SCT*                    | 64                 | alive                  | -                                                                         |
|                                     | 34   | -                            | -                                               | none                        | -                                            | -                                       | -                          | CR after SCT                  | negative after SCT                     | 22                 | alive                  | -                                                                         |
|                                     | 35   | -                            | -                                               | none                        | -                                            | -                                       | -                          | PR****                        | negative**                             | 40                 | alive                  | -                                                                         |
|                                     | 36   | -                            | -                                               | none                        | -                                            | -                                       | -                          | CR                            | positive (decline)                     | 44                 | alive                  | -                                                                         |
| EBV-CTL not used                    | 37   | -                            | -                                               | -                           | -                                            | -                                       | -                          | -                             | -                                      | -                  | deceased               | multiorgan failure, uncontrolled EBV reactivation and lymphoproliferation |
|                                     | 38   | -                            | -                                               | -                           | -                                            | -                                       | -                          | -                             | -                                      | -                  | deceased               | aspergillosis, progression of PTLD                                        |
|                                     | 39   | -                            | -                                               | -                           | -                                            | -                                       | -                          | -                             | -                                      | -                  | alive                  | -                                                                         |
|                                     | 40   | -                            | -                                               | -                           | -                                            | -                                       | -                          | -                             | -                                      | -                  | alive                  | -                                                                         |

patients with two EBV-CTL manufacturing processes: No. 1 = No. 3; No. 24 = No. 36; No. 33 = No. 40

\*patient No. 33: increasing EBV load despite EBV-CTL transfer, CR after HSCT without further EBV treatment

\*\* EBV-PCR negative before transfer of EBV-CTL

\*\*\*patient No. 4: no DLI but transfer of CMV-CTL 3 months before transfer of EBV-CTL

\*\*\*\*patient No. 27 and 35: clinical response SD/PR but complete metabolic response (PET)

**Patient-tailored adoptive immunotherapy with EBV-specific T cells from related and unrelated donors**

**Supplemental Table 2: Clinical-grade EBV-CTL manufacturing, CliniMACS Plus vs. CliniMACS Prodigy.**

Enrichment of IFN  $\gamma$ -secreting, EBV-specific CD3<sup>+</sup>, CD4<sup>+</sup>, and CD8<sup>+</sup> T cells after stimulation with GMP-grade PepTivators EBV\_EBNA-1 and EBV\_Select and enrichment using the CliniMACS CCS and CliniMACS Plus or Prodigy device.

|                |        | Viability [%] | CD3 <sup>+</sup> [10 <sup>6</sup> ] | CD3 <sup>+</sup> /IFN- $\gamma$ <sup>+</sup> [10 <sup>6</sup> ] | CD3 <sup>+</sup> /IFN- $\gamma$ <sup>+</sup> [%] | CD4 <sup>+</sup> /IFN- $\gamma$ <sup>+</sup> [%] | CD8 <sup>+</sup> /IFN- $\gamma$ <sup>+</sup> [%] |
|----------------|--------|---------------|-------------------------------------|-----------------------------------------------------------------|--------------------------------------------------|--------------------------------------------------|--------------------------------------------------|
| Plus (n=13)    | Mean   | 68.1          | 3.95                                | 1.55                                                            | 36.84                                            | 36.03                                            | 64.48                                            |
|                | Median | 71.07         | 2.44                                | 0.93                                                            | 41.81                                            | 39.36                                            | 80.18                                            |
|                | SD     | 7.1           | 3.63                                | 1.52                                                            | 15.18                                            | 15.15                                            | 27.65                                            |
| Prodigy (n=27) | Mean   | 71.6          | 9.39                                | 3.7                                                             | 42.91                                            | 41.11                                            | 55.67                                            |
|                | Median | 72.94         | 9.53                                | 3.16                                                            | 41.76                                            | 40.1                                             | 55.11                                            |
|                | SD     | 11.7          | 4.24                                | 2.31                                                            | 14.53                                            | 12.7                                             | 21.79                                            |
